# Supplementary material for: External application of liver compresses to reduce fatigue in patients with metastatic cancer undergoing radiation therapy, a randomized clinical trial
Source: Springer Nature journal article supplement (doi:10.1186/s13014-021-01757-x), 2021-04-19
Supplement: MOESM1 [file 19083348]

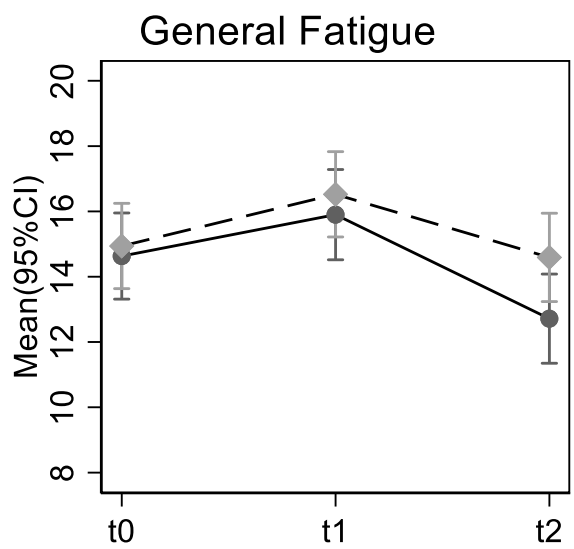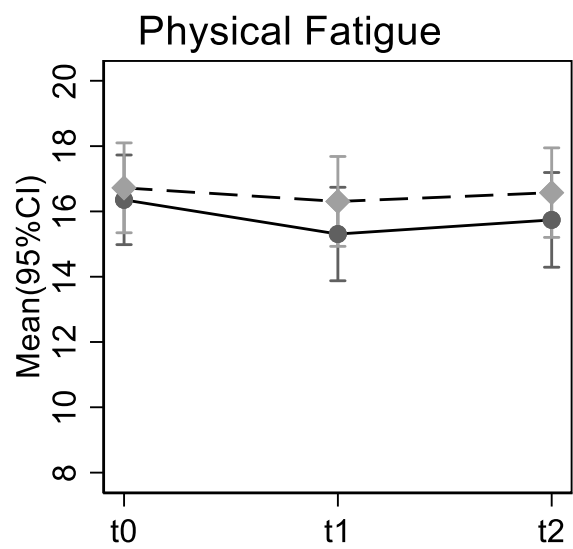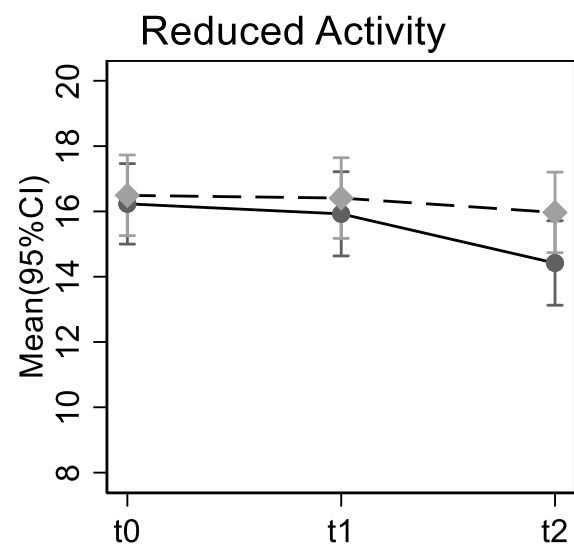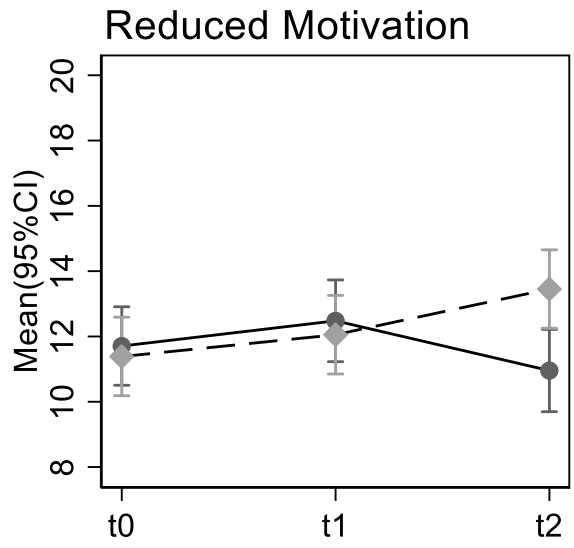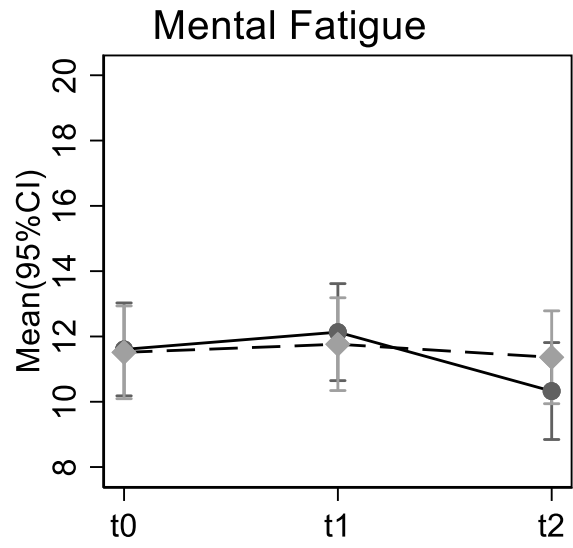

—●— Intervention group  
- -◆- - Control group
